# Supplementary material for: Antioxidant evaluation-guided chemical profiling and structure-activity analysis of leaf extracts from five trees in Broussonetia and Morus (Moraceae)
Source: PubMed Central journal article supplement (PMC7075987; doi:10.1038/s41598-020-61709-5), 2020-03-16
Supplement: 41598_2020_61709_MOESM1_ESM.pdf [file 41598_2020_61709_MOESM1_ESM.pdf]

# Antioxidant evaluation-guided chemical profiling and structure-activity analysis of leaf extracts from five trees in *Broussonetia* and *Morus* (Moraceae)

Xinxin Cao<sup>1</sup>, Lingguang Yang<sup>1</sup>, Qiang Xue<sup>1</sup>, Fan Yao<sup>1</sup>, Jing Sun<sup>1</sup>, Fuyu Yang<sup>2</sup>, and Yujun Liu<sup>1,\*</sup>

## Supplementary Figures

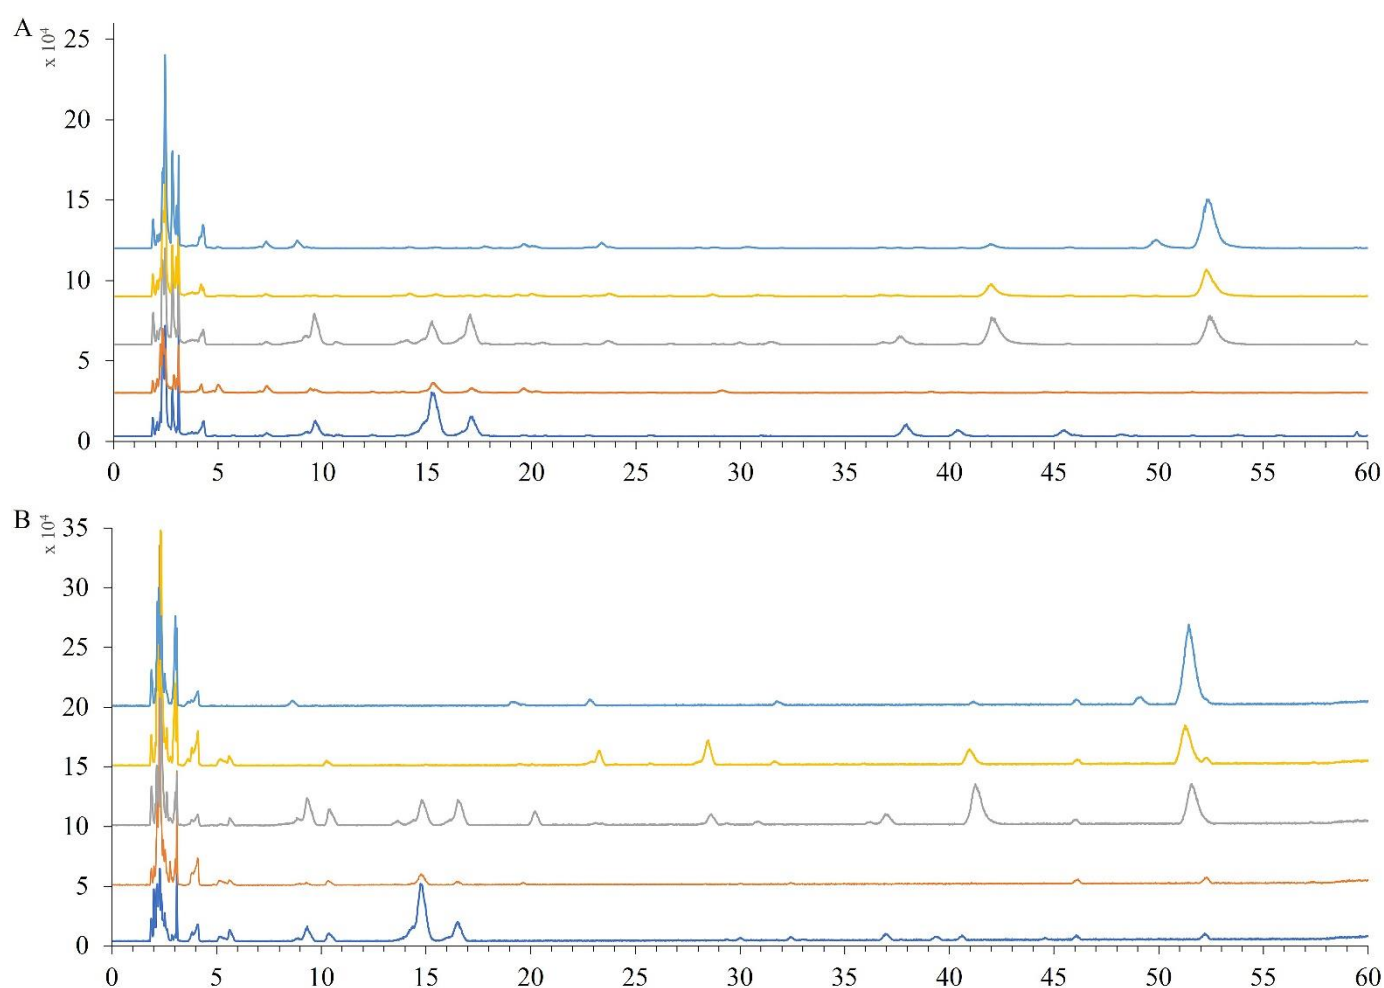

**Figure S1.** Ultra-performance liquid chromatography–quadrupole time-of-flight tandem mass spectrometry (UPLC–QTOF–MS/MS) profiles of the five leaf extracts obtained under optimized conditions (from top to bottom, HBP, BP, BK, MA and HMA). (A) Negative ion mode; (B) positive ion mode.

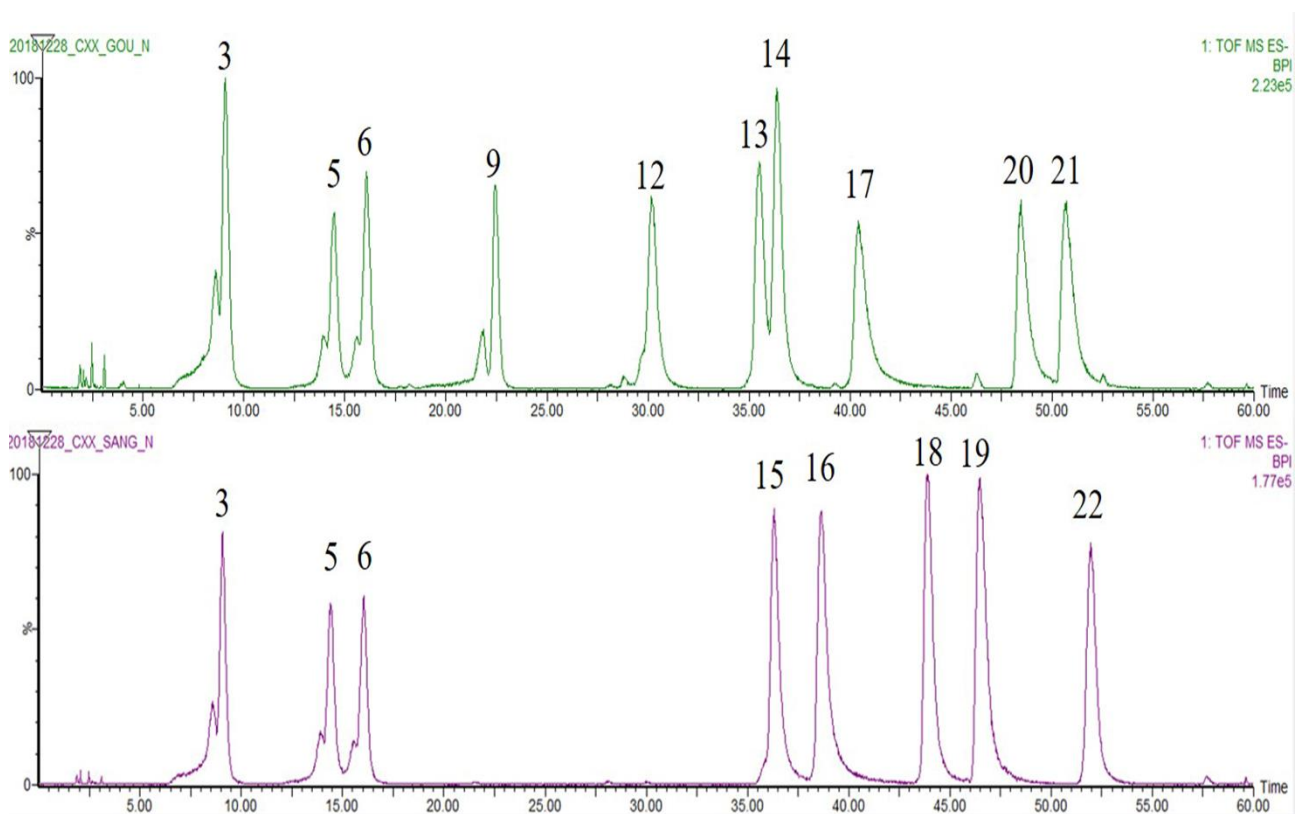

**Figure S2.** UPLC–QTOF–MS/MS profiles of the 15 authentic standards obtained under optimized conditions. Peak numbers for individual phenolic compounds are as listed in Tables 1 and 2: 5-caffeoylquinic acid (3); 3-caffeoylquinic acid (5); 4-caffeoylquinic acid (6); vicenin-2 (9); orientin (12); vitexin (13); isovitexin (14); rutin (15); isoquercitrin (16); luteolin-7-*O*-glucuronide (17); kaempferol-3-*O*-rutinoside (18); kaempferol-3-*O*-glucoside (19); apigenin 7-*O*-glucoside (20); apigenin-7-*O*-glucuronide (21); 4,5-dicaffeoylquinic acid (22).

**Supplementary Table**

**Table S1.** Peak areas of extracts.

| Species | Peak | Analytes                           | PK0       | PK1       | PK5       | PK10      | PK7        |
|---------|------|------------------------------------|-----------|-----------|-----------|-----------|------------|
| MA      | 3    | 5-Caffeoylquinic acid              | 409,340   | 131,177   | 64,208    | 36,978    | 189,506    |
|         | 5    | 3-Caffeoylquinic acid              | 1,140,593 | 377,907   | 95,994    | 60,574    | 573,742    |
|         | 6    | 4-Caffeoylquinic acid              | 384,022   | 107,506   | 79,719    | 64,160    | 173,119    |
|         | 15   | Rutin                              | 58,590    | 9,327.667 | 7403.333  | 5,807.333 | 14,424.667 |
|         | 16   | Isoquercitrin                      | 58,114    | 7,039.333 | 0         | 0         | 11,132     |
|         | 19   | Kaempferol-3- <i>O</i> -glucoside  | 37,454    | 4012      | 11097.667 | 2,306.667 | —*         |
| HMA     | 3    | 5-Caffeoylquinic acid              | 2,256,111 | 673,441   | 294,759   | 73,533    | 724,905    |
|         | 5    | 3-Caffeoylquinic acid              | 9,759,604 | 3,392,971 | 968,466   | 291,202   | 3,593,089  |
|         | 6    | 4-Caffeoylquinic acid              | 3,018,856 | 949,305   | 325,096   | 80,969    | 993,362    |
|         | 15   | Rutin                              | 771,584   | 236,064   | 10,356    | 9,472     | 277,638    |
|         | 16   | Isoquercitrin                      | 559,658   | 115,938   | 6,061     | 0         | 128,383    |
|         | 18   | Kaempferol-3- <i>O</i> -rutinoside | 628,571   | 267,140   | 151,664   | 119,551   | 534,455    |
|         | 19   | Kaempferol-3- <i>O</i> -glucoside  | 405,373   | 106,294   | 46,145    | 30,479    | 215,197    |
|         | 22   | 4,5-Dicaffeoylquinic acid          | 375,113   | 95,081    | 10,562    | 7,845     | 112,132    |
| BP      | 3    | 5-Caffeoylquinic acid              | 257,348   | 31,929    | 13,589    | 15,842    | 61,962     |
|         | 6    | 4-Caffeoylquinic acid              | 331,144   | 53,634    | 23,245    | 23,234    | 71,296     |
|         | 12   | Orientin                           | 149,969   | 1,658     | 0         | 0         | 25,589     |
|         | 13   | Vitexin                            | 197,528   | 46,739    | 44,905    | 44,705    | 48,775     |
|         | 14   | Isovitexin                         | 226,861   | 56,535    | 50,710    | 50,307    | 57,394     |
|         | 17   | Luteolin-7- <i>O</i> -glucuronide  | 1,871,251 | 29,462    | 0         | 0         | 403,495    |
|         | 21   | Apigenin-7- <i>O</i> -glucuronide  | 4,943,131 | 1,497,898 | 1,437,140 | 1,410,739 | 1,509,926  |
| HBP     | 9    | Vicenin-2                          | 571,047   | 214,156   | 205,851   | 198,704   | 216,117    |
|         | 13   | Vitexin                            | 74,102    | 22,123    | 22,637    | 21,686    | 23,875     |
|         | 14   | Isovitexin                         | 107,615   | 34,635    | 32,687    | 30,528    | 34,839     |
|         | 17   | Luteolin-7- <i>O</i> -glucuronide  | 441,761   | 0         | 0         | 0         | 104,718    |
|         | 20   | Apigenin 7-glucoside               | 966,068   | 314,247   | 308,513   | 287,503   | 349,096    |
|         | 21   | Apigenin-7- <i>O</i> -glucruonide  | 9,492,549 | 3,442,524 | 3,272,994 | 3,024,951 | 3,486,014  |
| BK      | 3    | 5-Caffeoylquinic acid              | 4,068,748 | 1,341,633 | 435,516   | 130,898   | 1,641,436  |
|         | 5    | 3-Caffeoylquinic acid              | 3,934,672 | 1,085,867 | 393,011   | 147,641   | 1,370,160  |
|         | 6    | 4-Caffeoylquinic acid              | 4,853,944 | 1,141,226 | 436,414   | 153,044   | 1,468,388  |
|         | 12   | Orientin                           | 307,739   | 82,763    | 1,995     | 0         | 99,037     |
|         | 14   | Isovitexin                         | 1,138,799 | 365,801   | 309,339   | 257,594   | 384,207    |
|         | 17   | Luteolin-7- <i>O</i> -glucuronide  | 4,494,512 | 1,250,890 | 31,990    | 2,667     | 1,398,513  |
|         | 21   | Apigenin-7- <i>O</i> -glucronide   | 5,120,042 | 1,581,017 | 1,414,865 | 1,650,471 | 1,678,148  |

PK0: initial peak area of samples before reaction with free radicals. PK1, PK5, PK10, and PK7: final peak areas of extracts after reaction with 1, 5, and 10 mM DPPH and 7 mM ABTS, respectively. Peak areas are means of three independent experiments (n = 3), standard data not shown. —\*: signal covered by the ABTS peak.
